# Supplementary material
Source: PubMed Central journal article supplement (PMC3556990)
Supplement: NIHMS395501-supplement-2.pdf [file NIHMS395501-supplement-2.pdf]

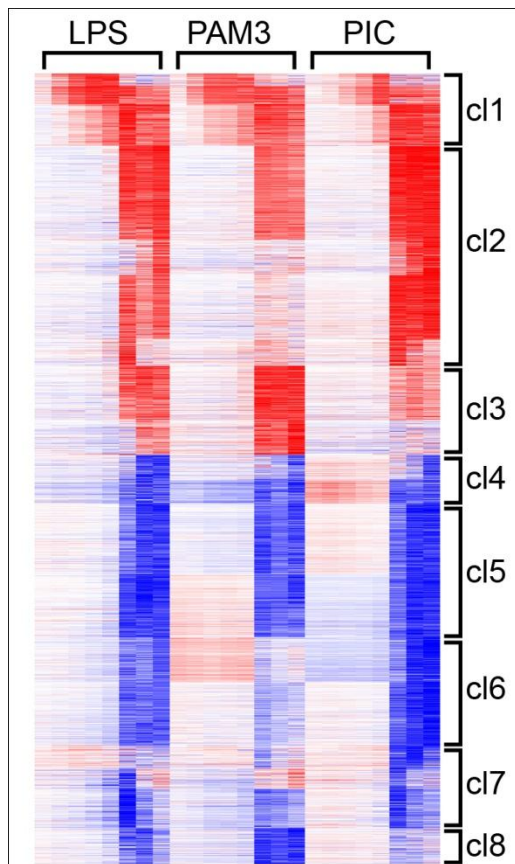

**Supplementary Figure 1. Gene expression analysis in macrophages.** Microarray analysis of mRNA from wild-type BMMs stimulated for 20, 40, 60, 80, 120, 240, 360 and 480 minutes with LPS (10ng/ml), Pam3 (300ng/ml) or PIC (6 $\mu$ g/ml) is presented as a heat map. Gene cluster analysis was performed using the K-means algorithm with squared Euclidean distance and clearly distinguished gene clusters induced or repressed by specific TLR agonists. Relative expression values are color-coded (red: TLR-induced, blue: TLR-repressed). Data represent the average of three independent experiments.

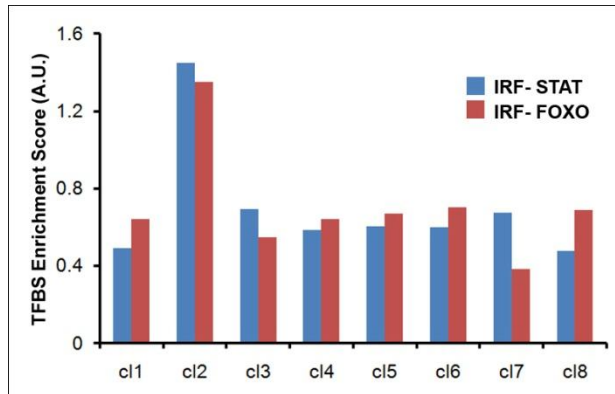

**Supplementary Figure 2. Motif scanning analysis identifies overrepresentation of IRF-STAT and IRF-FOXO TFBS pairs in cis-regulatory regions of cluster 2 genes.** Shown are relative IRF-STAT and IRF-FOXO TFBS pair-wise enrichment scores per gene cluster. This score indicates the relative frequency of co-occurrence of TFBS pair within a 250bp proximity limit to each other in a gene promoter region. Overrepresentation of IRF-STAT and IRF-FOXO TFBS pairs in the promoter regions of cluster 2 genes provides an indication for transcriptional co-regulation of IRF, STAT and FOXO transcription factors.

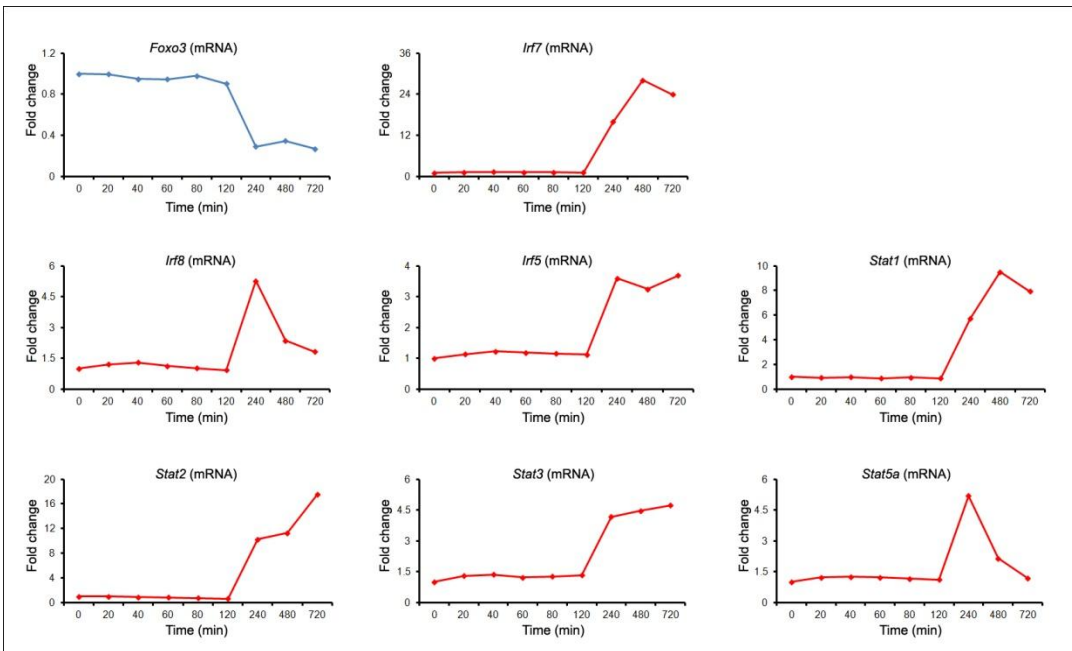

**Supplementary Figure 3. Transcriptional profiling of PIC-induced and PIC-repressed genes encoding for transcription factors.** Shown are mRNA levels of genes encoding for *Irf5*, *Irf7*, *Irf8*, *Stat1*, *Stat2*, *Stat3*, *Stat5a* and *Foxo3* in wild-type BMMs stimulated for 60, 120, 240, and 480 minutes with PIC (6 μg/ml) normalized to that in unstimulated cells.

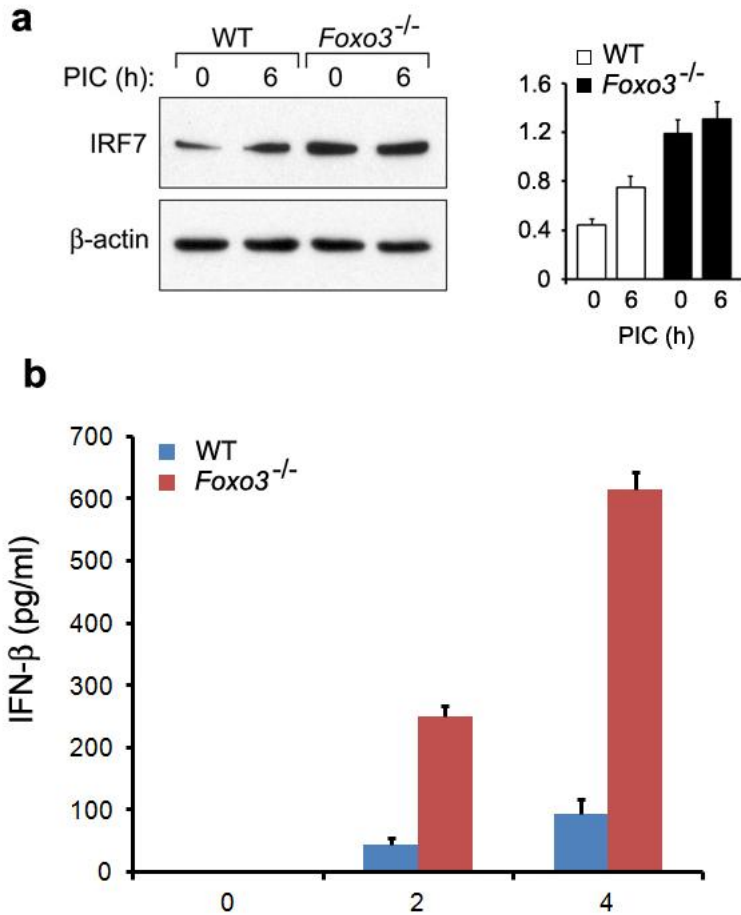

**Supplementary Figure 4. Increased IRF7 and IFN $\beta$  protein levels in *Foxo3*-null macrophages.** **a**, Immunoblot of IRF7 demonstrates that PIC-stimulation of wild type macrophages results in a significant increase in IRF7 protein levels. Increased protein levels of IRF7 were observed in *Foxo3* null BMMs under basal conditions. Bar graph demonstrates densitometric quantification of IRF7 protein levels. The data represent the average of three independent experiments  $\pm$  standard error. **b**, Enzyme-linked immunosorbent assay (ELISA) of IFN $\beta$  in supernatants of WT and *Foxo3*-null BMMs stimulated with PIC (6 $\mu$ g/ml) for the indicated times. The data represent the average of three independent experiments  $\pm$  standard error.

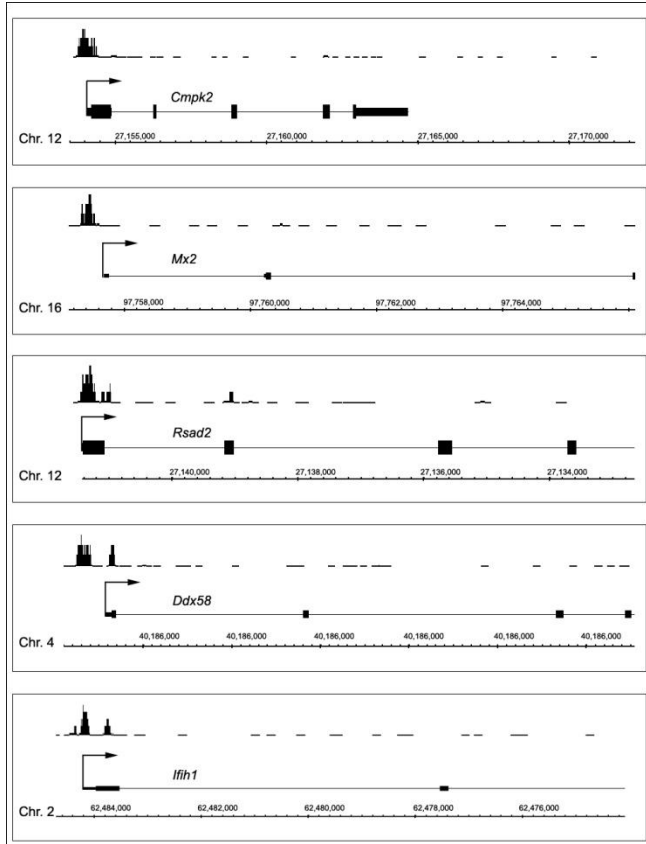

**Supplementary Figure 5. Direct targets of FOXO3.** ChIP-Seq analysis demonstrates FOXO3 binding profiles at *Cmpk2*, *Mx2*, *Rsad2*, *Ddx58* and *Ifih1* gene promoters in wild type unstimulated BMMs. The ChIP-Seq data are aligned to the mouse genome (NCBI37/mm9; July 2007). The arrow represents transcriptional start site of a gene. ChIP-Seq data are shown in reads per million. Data are representative of two experiments.

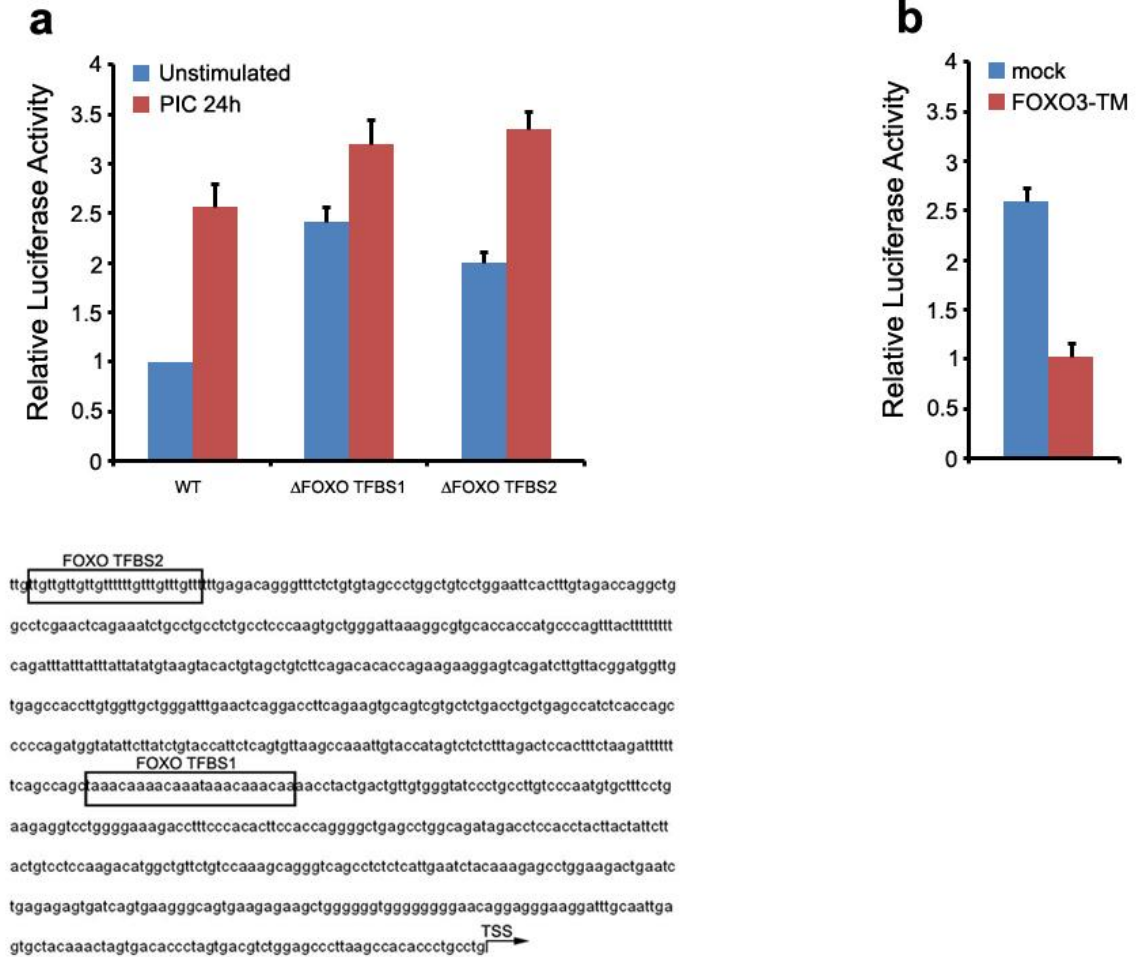

**Supplementary Figure 6. FOXO3 represses *Irf7* promoter activity a**, Deletion of FOXO TFBS in the *Irf7* gene promoter resulted in an increased basal *Irf7* promoter activity. RAW 264.7 cells were transiently transfected with *Irf7* promoter luciferase reporter constructs including wild-type *Irf7* promoter and FOXO TFBS deletion mutants of *Irf7* promoter, as indicated in the lower panel. The data represent the average of three independent experiments  $\pm$  standard error. The results were expressed as fold induction over the activity of wild type *Irf7* promoter luciferase reporter in unstimulated cells. **b**, RAW 264.7 cells were transiently co-transfected with

*Irf7* promoter luciferase reporter construct and constitutively active FOXO3 (FOXO3-TM). Cells were stimulated with PIC for 24 hours. All luciferase activity was normalized to the expression of the cotransfected Renilla luciferase. The data represent the average of three independent experiments  $\pm$  standard error.

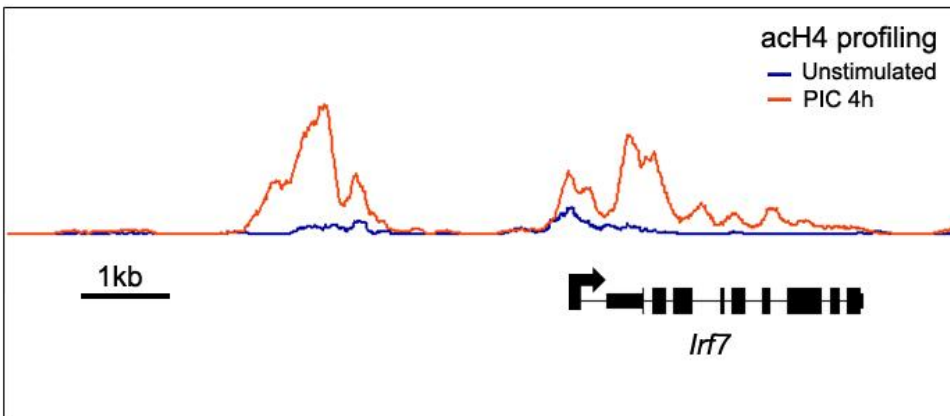

**Supplementary Figure 7. Enhanced histone acetylation at *Irf7* gene promoter in activated macrophages.** Shown are ChIP-Seq profiles of acetylated histone H4 in wild type BMMs in the presence (red line) or absence (blue line) of PIC. The arrow represents transcriptional start site of a gene. ChIP-Seq data are shown in reads per million. Data are representative of two experiments.

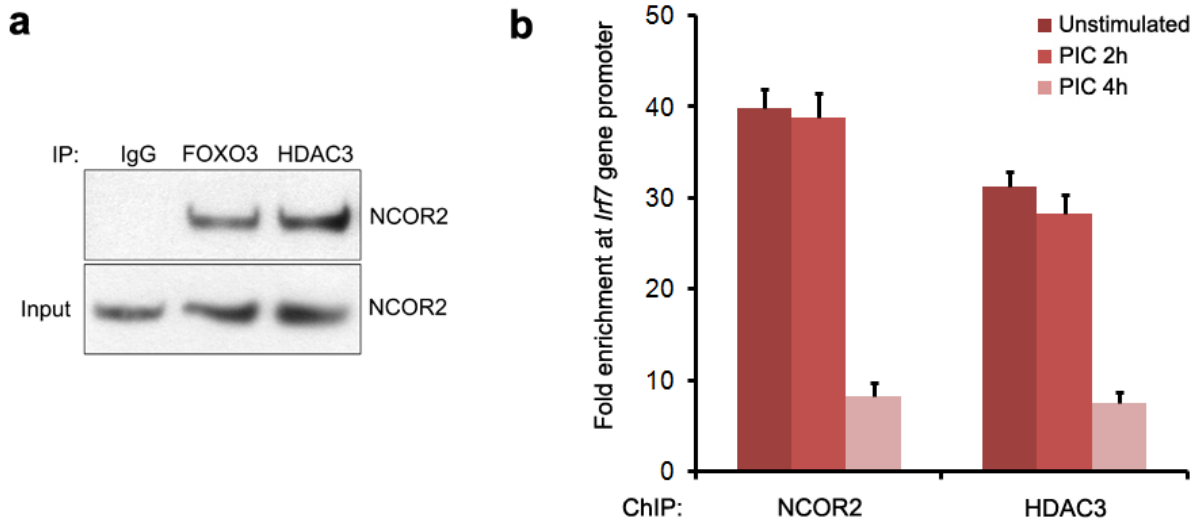

**Supplementary Figure 8. FOXO3 interacts with NCOR2 and HDAC3** **a**, Co-immunoprecipitation analysis demonstrates interaction of FOXO3 with nuclear co-repressor 2 (NCOR2) and histone deacetylase 3 (HDAC3) in macrophages. Unstimulated macrophages from wild-type mice were lysed and processed for immunoprecipitation with either anti-FOXO3 or anti-HDAC3 antibodies and immunoblotted with anti-NCOR2. Immunoprecipitation with IgG was used as a negative control. Data are representative of two independent experiments. **b**, ChIP analysis of NCOR2 and HDAC3 binding at *Irf7* gene promoter. Stimulation with PIC (6 $\mu$ g/ml) results in the clearance of NCOR2 and HDAC3 from *Irf7* gene promoter. Data was normalized to IgG (negative control) and represent the average of three independent experiments  $\pm$  standard error.



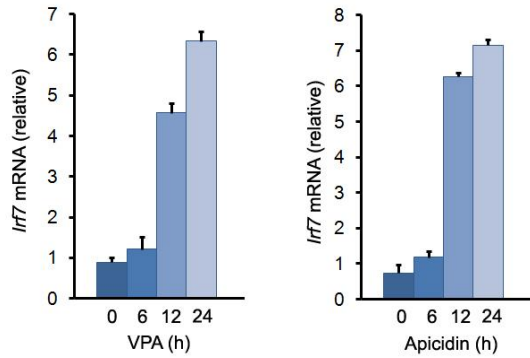

**Supplementary Figure 9. Treatment with HDAC inhibitors increases *Irf7* mRNA levels in macrophages.** Wild type BMMs were treated with Valproic acid (VPA, 5mM), and Apicidin (2.5 $\mu$ M), for the indicated times and *Irf7* mRNA levels were measured by quantitative real-time RT-PCR analysis. Data represent the average of three independent experimental values  $\pm$  standard error.

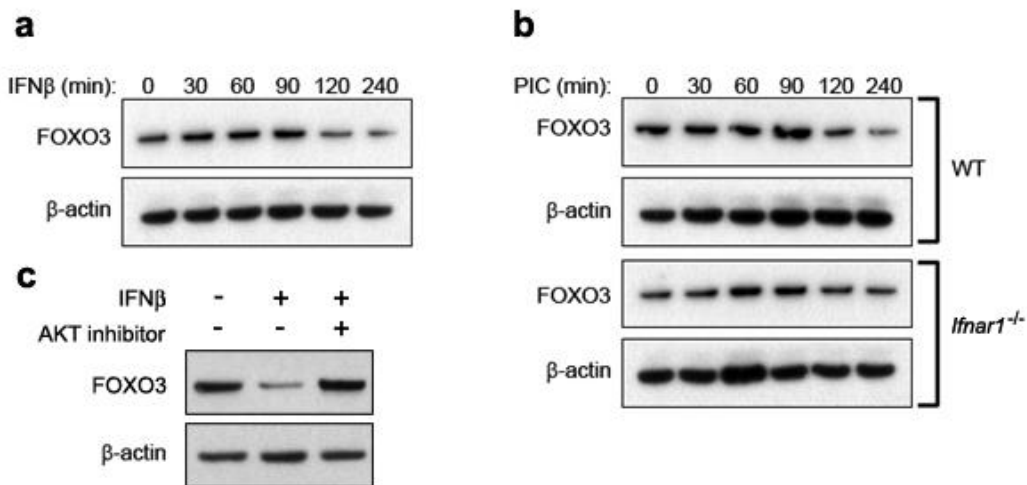

**Supplementary Figure 10. IFN represses FOXO3 protein levels.** Immunoblot of FOXO3 demonstrates that (a) Ifn $\beta$ - or (b) PIC-stimulation of wild type macrophages results in a significant decrease in FOXO3 protein levels. b, PIC-induced decrease of FOXO3 protein levels was not observed in *Ifnar1*-null cells. c, Treatment of the cells with AKT inhibitor IV abrogated Ifn $\beta$ -induced decrease in the FOXO3 protein level. Data are representative of three experiments.

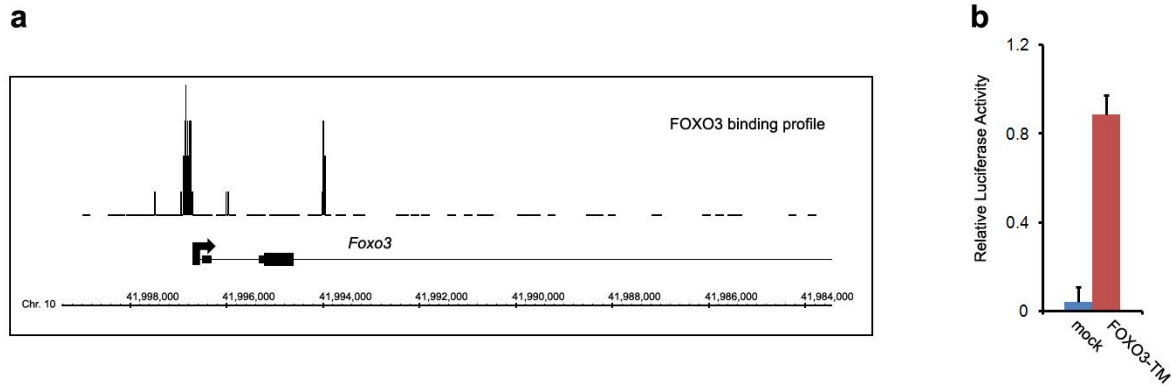

**Supplementary Figure 11. Foxo3 is required for its own transcription** **a**, ChIP-Seq analysis demonstrates FOXO3 binding profile at *Foxo3* gene promoter in wild type unstimulated BMMs. The ChIP-Seq data are aligned to the mouse genome (NCBI37/mm9; July 2007). The arrow represents transcriptional start site of a gene. ChIP-Seq data are shown in reads per million. Data are representative of two experiments. **b**, The 5'-flanking region DNA (-2500 to +500) of *Foxo3* gene was inserted into the firefly luciferase reporter. RAW 264.7 cells were transiently co-transfected with *Foxo3* promoter luciferase reporter and constitutively active FOXO3 (FOXO3-TM). All luciferase activity was normalized to the expression of the co-transfected Renilla luciferase. The data represent the average of three independent experiments  $\pm$  standard error.

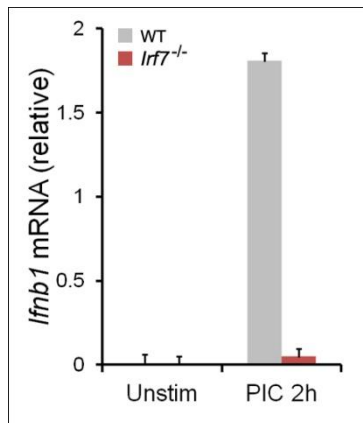

**Supplementary Figure 12. IRF7 is a critical regulator of PIC-induced *Ifnb1* transcription in macrophages.** Shown are *Ifnb1* mRNA levels in wild-type and *Irf7*<sup>-/-</sup> macrophages in the presence or absence of PIC stimulation. Data represent the average of three independent experiments.

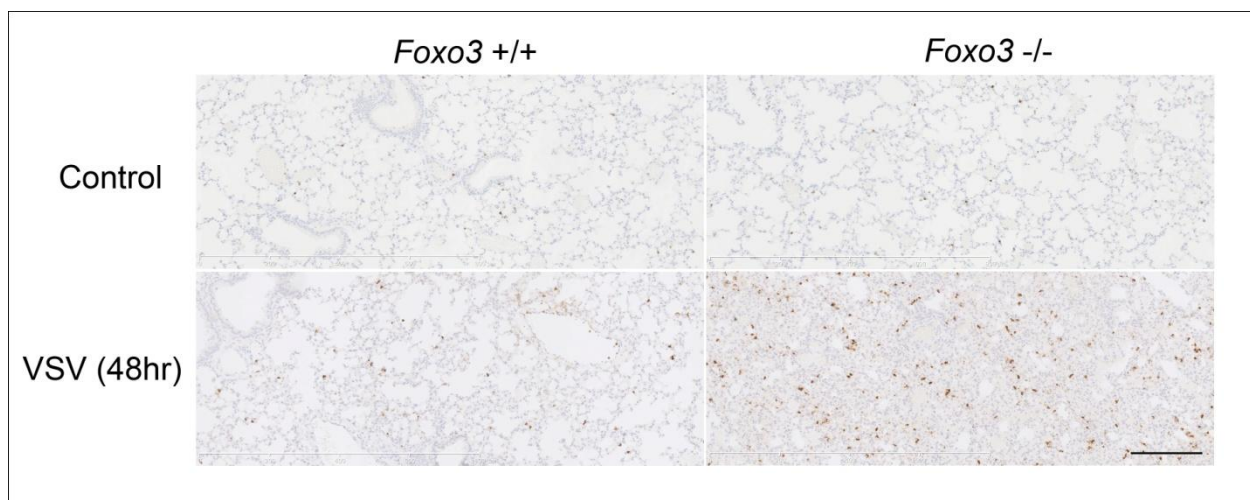

**Supplementary Figure 13. Enhanced neutrophil influx in the lungs of VSV-infected *Foxo3*-null mice.** Immunohistochemical analysis for LY6B demonstrated elevated numbers of neutrophils in the lungs of *Foxo3*-null mice on day 2 following VSV infection, relative to WT. Data are from one experiment out of three (n=6 mice per group). Scale bar, 200 $\mu$ m.

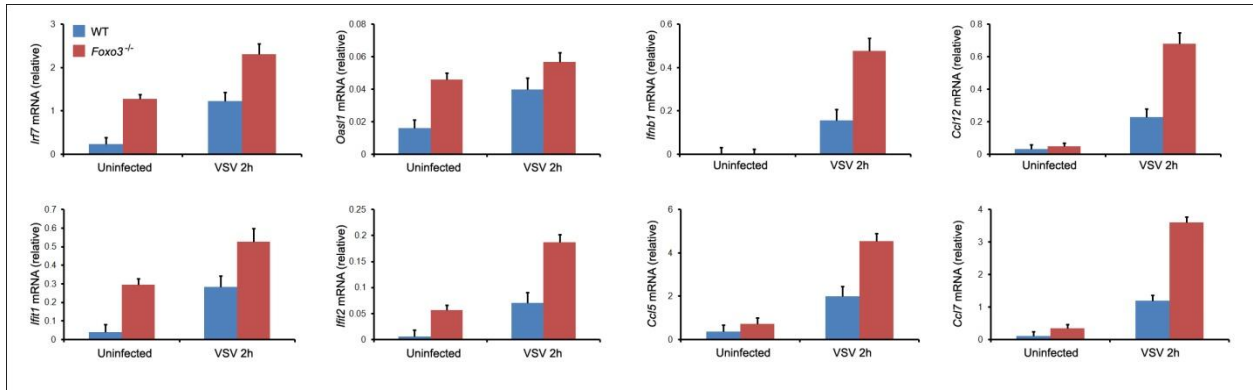

**Supplementary Figure 14. Enhanced antiviral response in alveolar macrophages isolated from VSV-infected *Foxo3*-null mice.** Alveolar macrophages were isolated from uninfected and VSV infected WT and *Foxo3*-null mice. mRNA levels of *Irf7*, *Ifnb1*, *Oas1*, *Ifi1*, *Ifi2*, *Ccl5*, *Ccl12* and *Ccl7* were measured by quantitative real-time RT-PCR analysis. Data represent the average of three independent experimental values  $\pm$  standard error.

**Supplementary Table 1. Microarray profiling in macrophages.** Microarray analysis of mRNA from wild-type BMMs stimulated for 20, 40, 60, 80, 120, 240, 360 and 480 minutes with LPS (10ng/ml), Pam3 (300ng/ml) or PIC (6µg/ml) identifies 8 gene clusters.

**Supplementary Table 2. Overrepresented TFBS pairs for cluster 2 genes.** Motif scanning analysis identifies overrepresentation of TFBS pairs in cis-regulatory regions of cluster 2 genes. Shown are normalized TFBS pair-wise enrichment scores for cluster 2 genes.

**Supplementary Table 3. Gene expression profiling of forkhead family members in PIC-stimulated macrophages.** Shown are mRNA levels of genes encoding for forkhead family transcription factors in wild type macrophages either in presence or absence of PIC.

**Supplementary Table 4. IFN signature genes are up-regulated in Foxo3-null BMMs under basal conditions.** Shown is the output of gene set enrichment analysis of genes differentially expressed in WT and Foxo3-null macrophages under basal conditions. IFN signature genes are ranked by metric score according to their differential expression between WT and Foxo3-null macrophages.

**Supplementary Table 5. IFN signature genes are up-regulated in Foxo3-null PIC-stimulated BMMs.** Shown is the output of gene set enrichment analysis of genes differentially expressed in WT and Foxo3-null macrophages following PIC stimulation. IFN signature genes are ranked by metric score according to their differential expression between WT and Foxo3-null macrophages.

**Supplementary Table 6. Foxo3 targets:** List of 45 FOXO3 targets that were identified by combined microarray and ChIP-Seq analysis. Genes are ranked by ChIP-Seq peak score that reflects the relative abundance of FOXO3 at the target gene promoter.

**Supplementary Table 7. Motif scanning of the Irf7 gene promoter.** Promoter sequences encompassing 3kb on either side of the transcriptional start site of a gene were scanned using 390 murine transcription factor matrices obtained from the TRANSFAC database and the software tool MotifLocator.

**Supplementary Table 8. Custom gene sets:** List of microarray-derived 24 custom gene sets that were used for gene set enrichment analysis.

**Supplementary Table 9. Quantitative RT-PCR primers.** Taqman primers used for cDNA expression analysis of selected genes by real-time PCR.

**Supplementary Table 10. ChIP primers.** Sequences of oligonucleotides used for quantitative ChIP analysis of selected genes by real-time PCR.
